# Supplementary material
Source: publisher site journal article supplement (https://www.dovepress.com/article/317922)
Supplement: Supplementary file 1 [file get_supplementary_file.php]

**Supplementary Table 1** Multivariate Cox proportional hazard analysis of GDF10 expression and clinical factors.

| Clinical factors | Adjusted P value | Hazard Ratio (95% confidence interval) |
| --- | --- | --- |
| Stage | 0.3378 | 2.28 (0.42 - 12.33) |
| Gender | 0.3730 | 1.30 (0.73 - 2.33) |
| Smoking history | 0.5431 | 0.78 (0.36 - 1.71) |
| GDF10 | 0.0138 | 0.47 (0.26 - 0.86) |

**Supplementary Table 2** Multivariate Cox proportional hazard analysis of HPGDS expression and clinical factors.

| Clinical factors | Adjusted P value | Hazard Ratio (95% confidence interval) |
| --- | --- | --- |
| Stage | 0.2830 | 2.50 (0.47 - 13.34) |
| Gender | 0.1506 | 1.55 (0.85 - 2.81) |
| Smoking history | 0.6384 | 1.22 (0.53 - 2.81) |
| HPGDS | 0.0213 | 0.49 (0.27 - 0.90) |

**Supplementary Table 3** Multivariate Cox proportional hazard analysis of ABCA8 expression and clinical factors.

| Clinical factors | Adjusted P value | Hazard Ratio (95% confidence interval) |
| --- | --- | --- |
| Stage | 0.3197 | 2.35 (0.44 - 12.67) |
| Gender | 0.1101 | 1.64 (0.89 - 3.00) |
| Smoking history | 0.8999 | 1.05 (0.47 - 2.33) |
| ABCA8 | 0.0140 | 0.47 (0.26 - 0.86) |

**Supplementary Table 4** Multivariate Cox proportional hazard analysis of SLIT3 expression and clinical factors.

| Clinical factors | Adjusted P value | Hazard Ratio (95% confidence interval) |
| --- | --- | --- |
| Stage | 0.2655 | 2.61 (0.48 - 14.13) |
| Gender | 0.1262 | 1.59 (0.88 - 2.90) |
| Smoking history | 0.8593 | 0.93 (0.43 - 2.02) |
| MEGF5 | 0.0340 | 0.54 (0.30 - 0.96) |

**Supplementary Table 5** Multivariate Cox proportional hazard analysis of ADAMTS8 expression and clinical factors.

| Clinical factors | Adjusted P value | Hazard Ratio (95% confidence interval) |
| --- | --- | --- |
| Stage | 0.2719 | 2.59 (0.47 - 14.09) |
| Gender | 0.1250 | 1.59 (0.88 - 2.90) |
| Smoking history | 0.9457 | 0.97 (0.44 - 2.14) |
| ADAMTS8 | 0.0310 | 0.55 (0.32 - 0.96) |
